# Supplementary material for: Stromal AR inhibits prostate tumor progression by restraining secretory luminal epithelial cells
Source: PubMed Central journal article supplement — Cell Rep. Author manuscript; Available in PMC 2022 Jun 8. (PMC9175887; doi:10.1016/j.celrep.2022.110848), 2022-05-24
Supplement: NIHMS1810675-supplement-1.pdf [file NIHMS1810675-supplement-1.pdf]

Cell Reports, Volume 39

## Supplemental information

### **Stromal AR inhibits prostate tumor progression by restraining secretory luminal epithelial cells**

**Yueli Liu, Jiawen Wang, Corrigan Horton, Chuan Yu, Beatrice Knudsen, Joshua Stefanson, Kevin Hu, Ofir Stefanson, Jonathan Green, Charlene Guo, Qing Xie, and Zhu A. Wang**

## Supplemental Figures

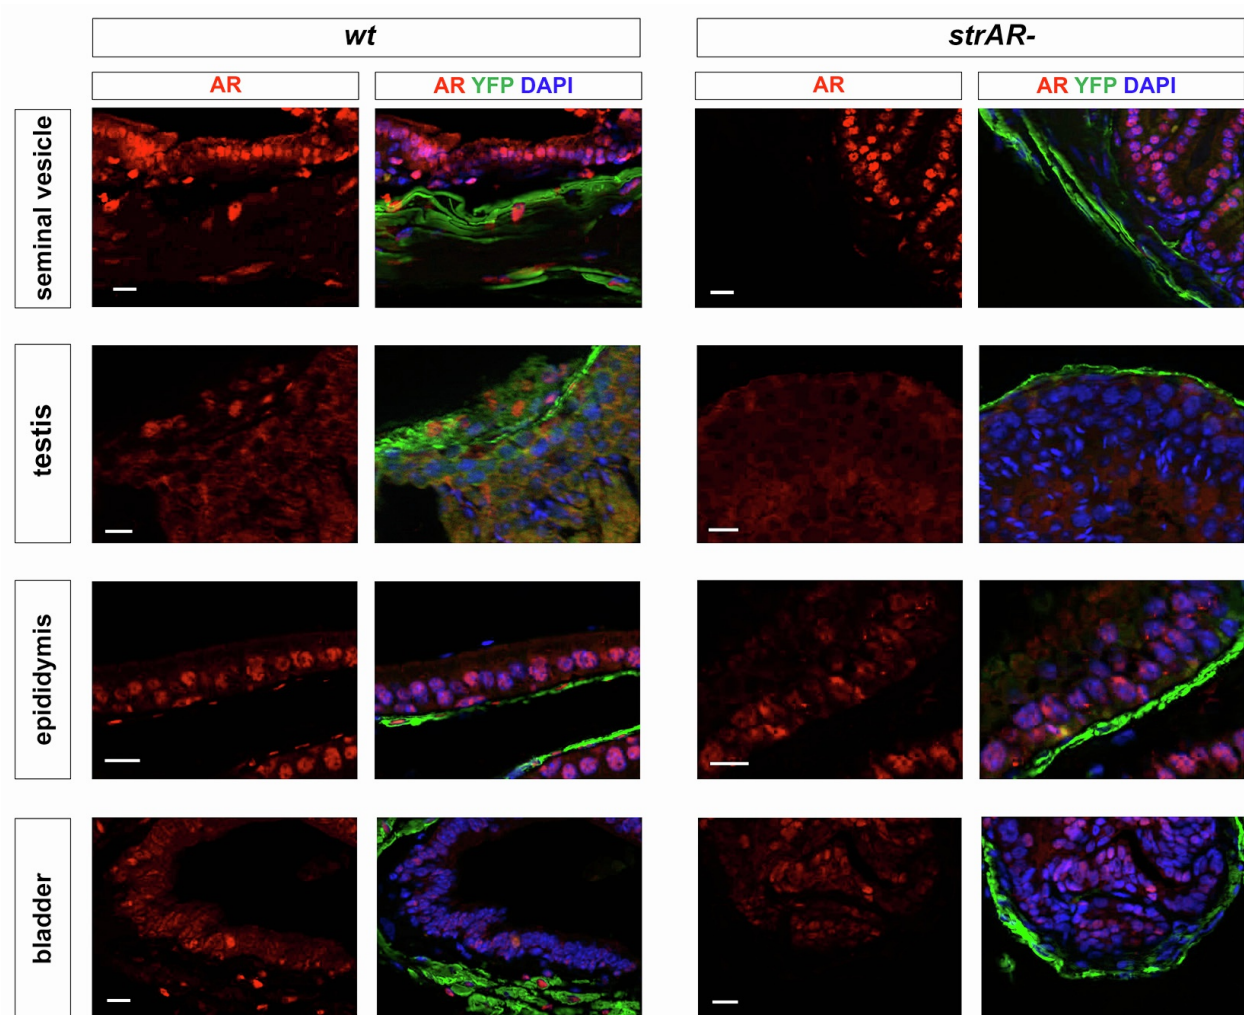

**Figure S1.** *Myh11-CreER<sup>T2</sup>* deletes stromal AR in other tissues. Related to Figure 1. IF staining showing that AR (red) was deleted in SMCs (green) of the seminal vesicle, testis, epididymis, and bladder in *str<sup>AR-</sup>* mice. Scale bar, 20  $\mu\text{m}$ .

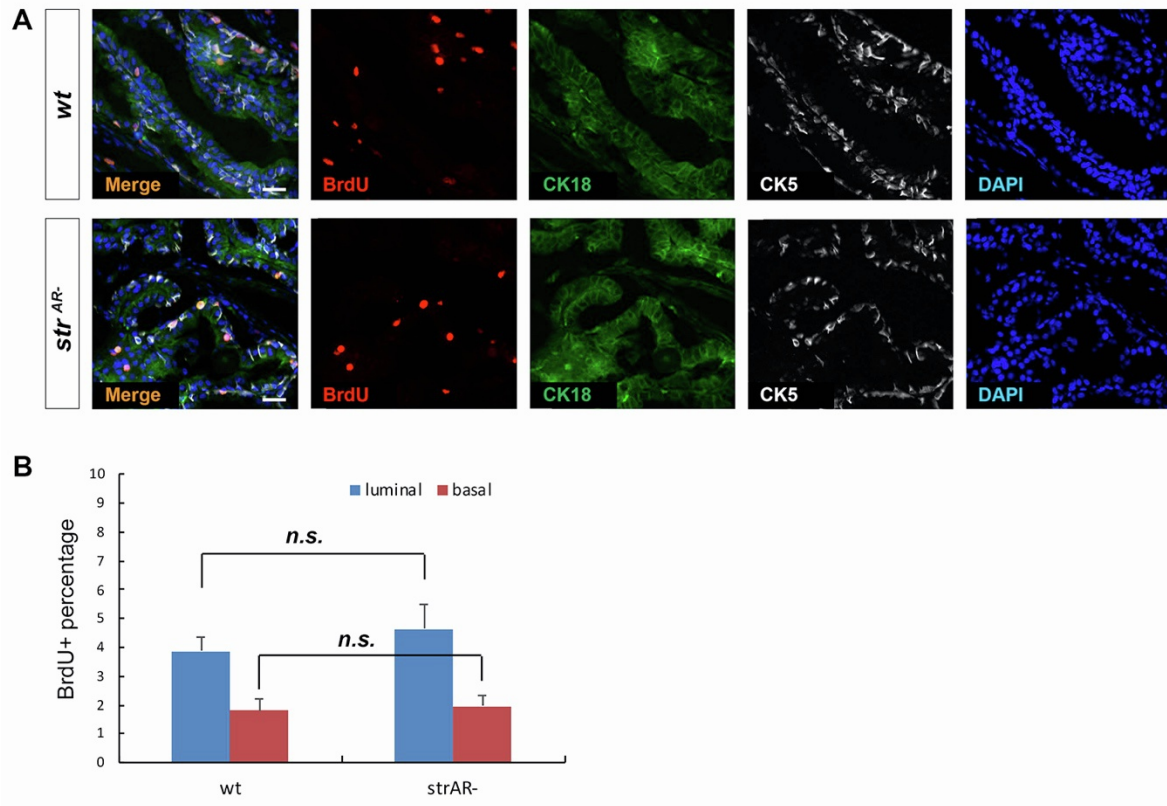

**Figure S2. BrdU assay comparing epithelial cell proliferation between  $str^{AR-}$  and  $wt$  prostate at 11 months of age. Related to Figure 1. (A)** Representative IF images with each individual channel. CK18 and CK5 mark luminal and basal cells, respectively. **(B)** Quantitation of the proportions of BrdU+ cells in luminal or basal cells of each sample. n.s., not significant by student  $t$ -test.

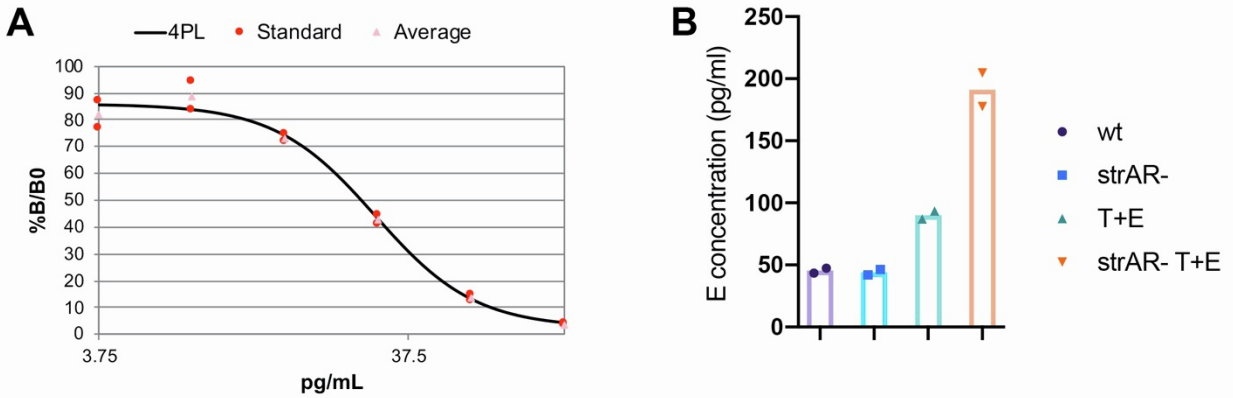

**Figure S3. ELISA measurement of serum estrogen levels after T+E treatment. Related to Figure 2.** (A) Standard curve created by the Arbor Assays Estradiol Serum EIA kit. (B) Quantitation of serum estradiol levels in age-matched *wt*, *str<sup>AR-</sup>*, and *T+E* and *str<sup>AR-</sup> T+E* mice 8 months after tube implantation. N=2 biological replicates in each group.

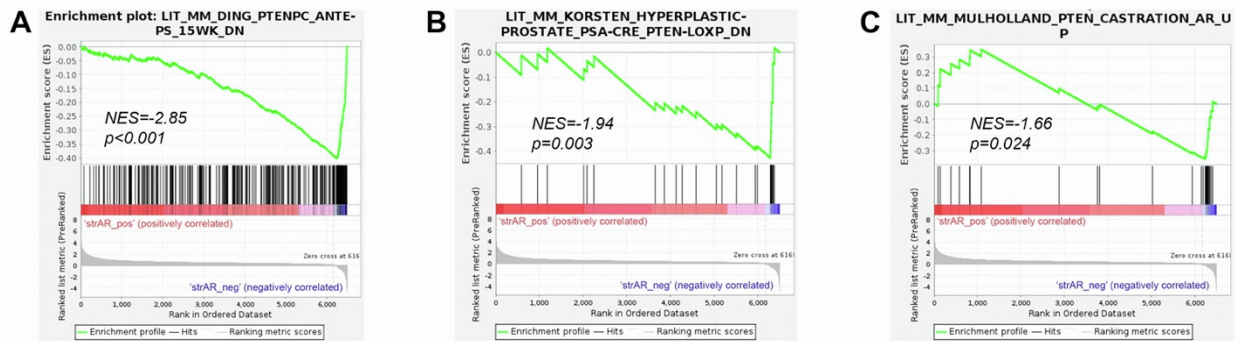

**Figure S4. GSEA comparing differentially expressed genes in secretory luminal cells of *str<sup>AR-</sup> T+E* vs *T+E* prostate. Related to Figure 3. (A-C) Genes downregulated in *str<sup>AR-</sup> T+E* vs *T+E* are enriched in two independent published gene signatures of downregulated genes of *Pten*-null tumors vs. wt (A, B) and a published gene signature of AR-responsive genes (C).**

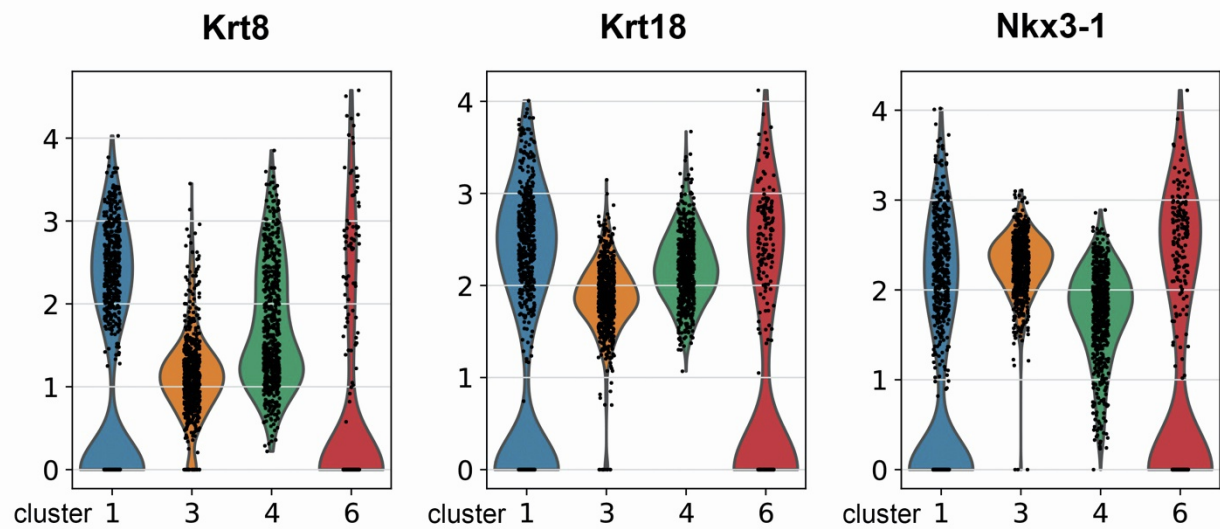

**Figure S5. Violin plots showing expression of luminal marker genes *Krt8*, *Krt18*, and *Nkx3.1* in clusters 1, 3, 4, and 6. Related to Figure 4. Clusters 1 and 6 include cells that failed to pass the minimal detection threshold at the base, but generally have cells with higher luminal marker expression levels than clusters 3 and 4.**



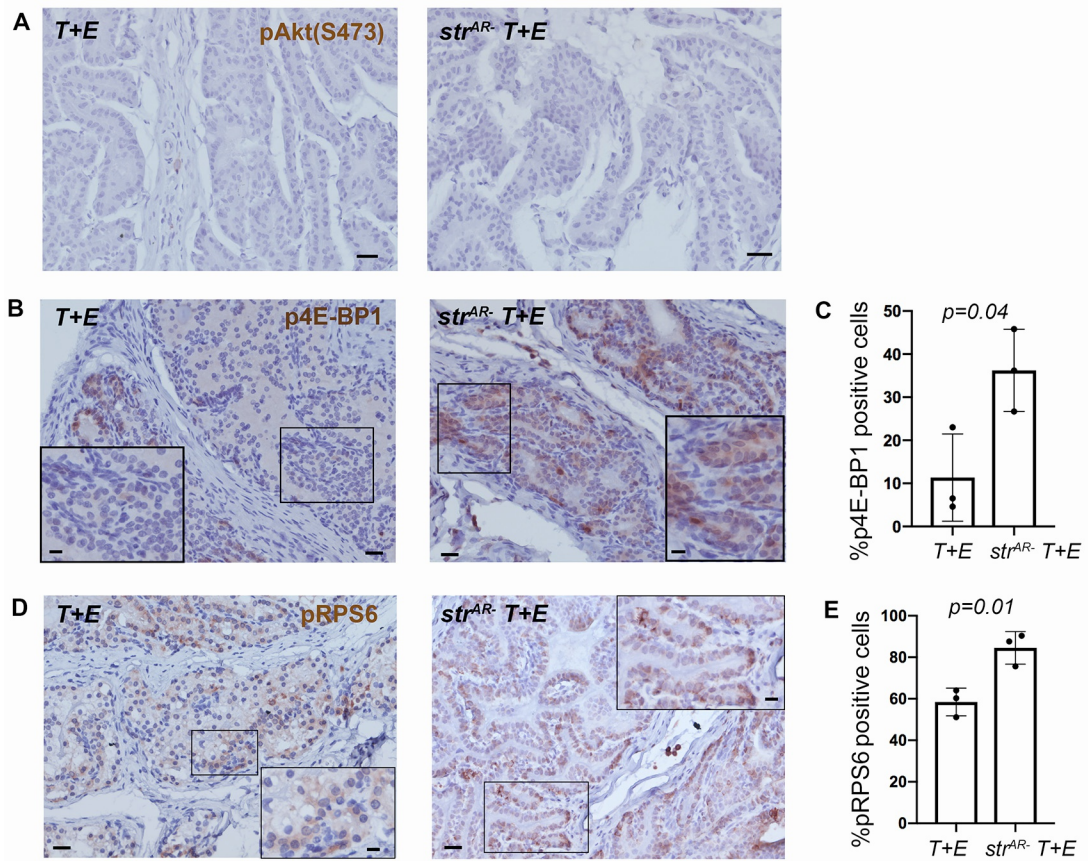

**Figure S6. Higher PI3K-mTORC1 activity in *str<sup>AR-</sup> T+E* tumors. Related to Figure 4.**

(A,B,D) Representative IHC images showing pAkt(S473) (A), p4E-BP1 (B), and pRPS6(S235/236) (D) staining in *T+E* (left) and *str<sup>AR-</sup> T+E* (right) tissues. Scale bars, 50  $\mu$ m. Scale bars in inset, 10  $\mu$ m. (C,E) Quantitation of percentages of p4E-BP1 positive cells (C) and pRPS6(S235/236) positive cells (E) in the tumor epithelium. N=3 animals per group. P values calculated by student's *t*-test.

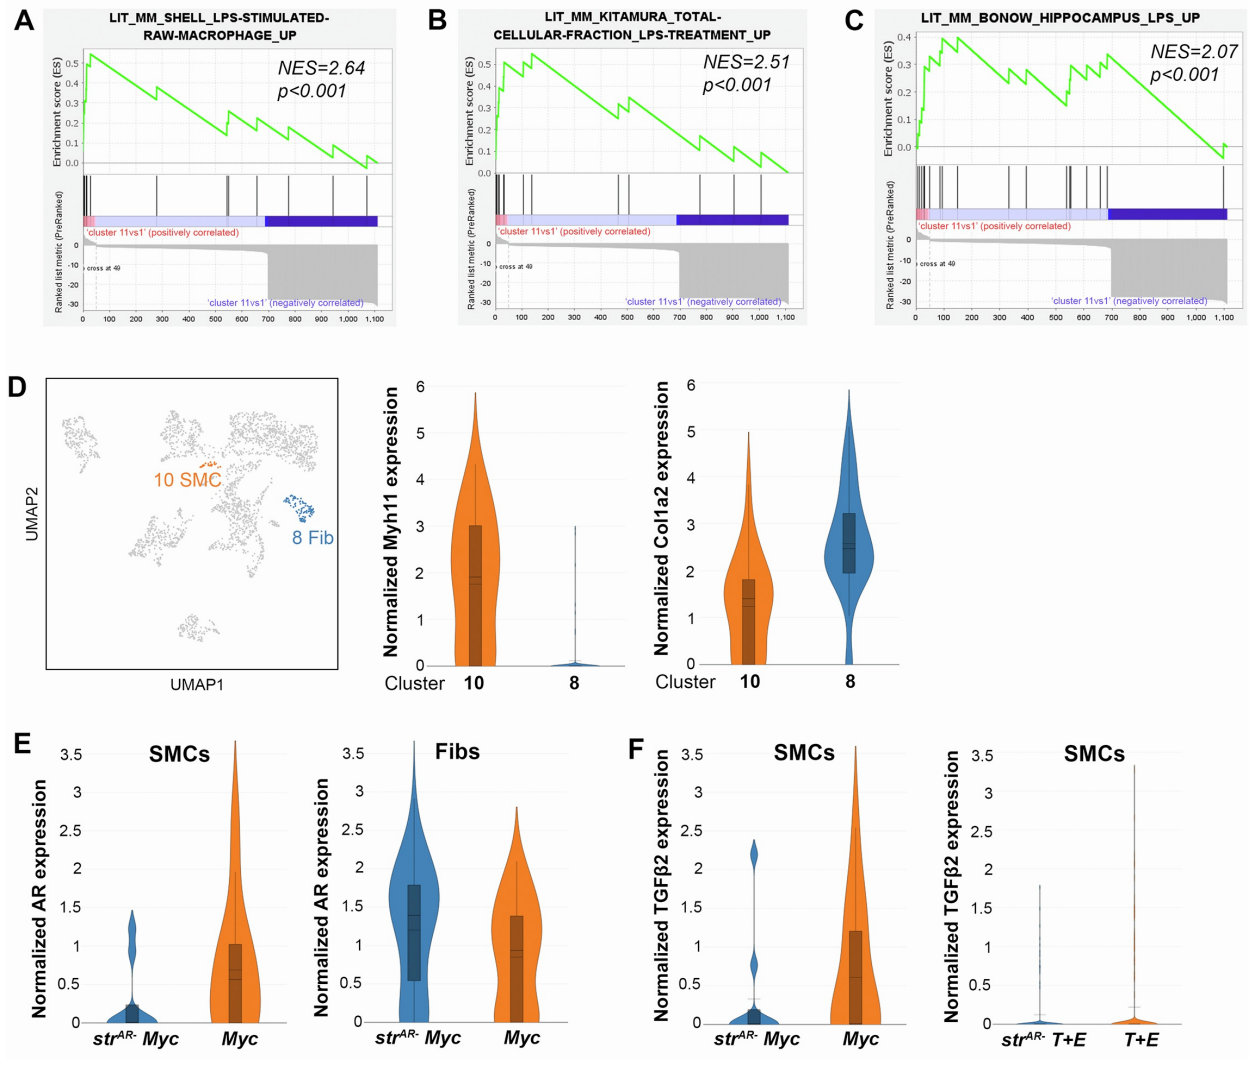

**Figure S7. GSEA analyses of clusters 11 and 1 and marker expressions in SMCs and fibroblasts. Related to Figure 5. (A-C)** GSEA showing enrichment of upregulated genes in cluster 11 vs cluster 1 in three published LPS-induced gene signatures. **(D)** Violin plots showing expression of *Myh11* (middle panel) and *Col1a2* (right panel) in clusters 10 and 8 of the UMAP (left panel). **(E)** Violin plots comparing *AR* expression in SMCs (left) and fibroblasts (right) between the *Myc* and *str<sup>AR-</sup> Myc* samples. **(F)** Violin plots comparing *TGFβ2* expression in SMCs between the *Myc* and *str<sup>AR-</sup> Myc* samples (left) and between the *T+E* and *str<sup>AR-</sup> T+E* samples (right).



## Supplemental Tables

**Table S1. *Hi-Myc* model H&E scores and histology. Related to Figure 2.**

| Mouse ID | Experiment | Score | Histology                                                                                     |
|----------|------------|-------|-----------------------------------------------------------------------------------------------|
| 425      | ctl-3m     | 5.04  | PIN1, dilated ducts, papillary and cribriform structures                                      |
| 426      | ctl-3m     | 4.74  | hyperplasia                                                                                   |
| 427      | ctl-3m     | 3.82  | hyperplasia                                                                                   |
| 2370     | ctl-3m     | 2.25  | overall normal, hyperplasia                                                                   |
| 2806     | ctl-3m     | 3.22  | overall normal, hyperplasia                                                                   |
| 2878     | ctl-3m     | 3.81  | hyperplasia                                                                                   |
| 9018     | ctl-3m     | 1.03  | overall normal, some autolysis                                                                |
| 9074     | ctl-3m     | 2.14  | overall normal, hyperplasia                                                                   |
| 9076     | ctl-3m     | 2.86  | overall normal, hyperplasia                                                                   |
|          |            |       |                                                                                               |
| 401      | AR-3m      | 3.28  | hyperplasia, inflammation                                                                     |
| 402      | AR-3m      | 5.42  | PIN1                                                                                          |
| 1494     | AR-3m      | 4.15  | hyperplasia                                                                                   |
| 1496     | AR-3m      | 4.73  | hyperplasia, focal PIN1                                                                       |
| 2919     | AR-3m      | 5.87  | PIN2, atypia                                                                                  |
| 2923     | AR-3m      | 4.20  | hyperplasia                                                                                   |
| 2975     | AR-3m      | 5.35  | PIN3, dilated ducts, atypia in cribriform area                                                |
| 9136     | AR-3m      | 3.06  | overall normal, hyperplasia                                                                   |
| 9165     | AR-3m      | 3.41  | hyperplasia                                                                                   |
| 9166     | AR-3m      | 3.93  | hyperplasia                                                                                   |
| 9167     | AR-3m      | 6.31  | focal PIN3, atypia,cribriform, columnar cells,pleomorphism                                    |
| 9168     | AR-3m      | 3.90  | hyperplasia                                                                                   |
|          |            |       |                                                                                               |
| 1101     | ctl-9m     | 4.01  | PIN1                                                                                          |
| 2369     | ctl-9m     | 3.97  | hyperplasia                                                                                   |
| 2371     | ctl-9m     | 3.77  | hyperplasia                                                                                   |
| 2372     | ctl-9m     | 4.39  | focal PIN1                                                                                    |
| 2460     | ctl-9m     | 3.22  | hyperplasia                                                                                   |
| 2519     | ctl-9m     | 3.61  | hyperplasia                                                                                   |
|          |            |       |                                                                                               |
| 1103     | AR-9m      | 4.46  | PIN1, focal proliferation to focal cribriform, mild atypia                                    |
| 2337     | AR-9m      | 6.14  | PIN3, dilated ducts, proliferation, mild atypia, periductal inflammation                      |
| 2368     | AR-9m      | 5.43  | PIN1, focal thick bridges of epithelium across glands, hyperplasia, marked atypia, cribriform |
| 9045     | AR-9m      | 6.57  | PIN2                                                                                          |
| 9046     | AR-9m      | 4.58  | focal PIN1, proliferation to cribriform, columnar cells                                       |
| 9047     | AR-9m      | 4.57  | PIN1, focal proliferation, mild atypia                                                        |

**Table S2. T+E2 model H&E scores and histology. Related to Figure 2.**

| Mouse ID | Experiment | Score | Histology                                                   |
|----------|------------|-------|-------------------------------------------------------------|
| 293      | ctl-4m     | 7.0   | PIN1                                                        |
| 330      | ctl-4m     | 5.0   | hyperplasia                                                 |
| 1198     | ctl-4m     | 5.5   | hyperplasia                                                 |
| 2736     | ctl-4m     | 3.5   | overall normal, hyperplasia                                 |
| 9384     | ctl-4m     | 3.0   | overall normal, hyperplasia                                 |
| 9437     | ctl-4m     | 3.0   | overall normal, hyperplasia                                 |
| 9625     | ctl-4m     | 4.5   | hyperplasia                                                 |
|          |            |       |                                                             |
| 1092     | AR-4m      | 5.5   | hyperplasia                                                 |
| 1123     | AR-4m      | 6.5   | PIN1, inflammation                                          |
| 1125     | AR-4m      | 7.0   | PIN1, inflammation                                          |
| 1134     | AR-4m      | 6.5   | PIN1                                                        |
| 1135     | AR-4m      | 5.5   | hyperplasia, necrosis                                       |
| 1136     | AR-4m      | 7.5   | PIN3, epithelial hyperplasia                                |
| 1201     | AR-4m      | 7.5   | focal PIN3, cribriform, columnar and atypical cells         |
| 1203     | AR-4m      | 6.0   | hyperplasia, focal PIN1                                     |
| 9446     | AR-4m      | 3.0   | overall normal, hyperplasia                                 |
| 9612     | AR-4m      | 5.0   | hyperplasia                                                 |
| 9615     | AR-4m      | 7.0   | hyperplasia, focal PIN1                                     |
|          |            |       |                                                             |
| 251      | ctl-8m     | 4.0   | overall normal, hyperplasia                                 |
| 1283     | ctl-8m     | 4.5   | hyperplasia                                                 |
| 1483     | ctl-8m     | 5.5   | hyperplasia                                                 |
| 1485     | ctl-8m     | 6.0   | hyperplasia, focal PIN1                                     |
| 5436     | ctl-8m     | 6.0   | PIN1                                                        |
|          |            |       |                                                             |
| 451      | AR-8m      | 6.5   | PIN1, epithelial hyperplasia                                |
| 579      | AR-8m      | 9.0   | PIN3, epithelial filling gland, gland enlargement           |
| 1087     | AR-8m      | 6.0   | focal PIN3, hyperplasia, gland filled with epithelial cells |
| 1279     | AR-8m      | 4.5   | hyperplasia, focal PIN1, inflammation                       |
| 5419     | AR-8m      | 7.0   | PIN1, epithelial hyperplasia, gland enlargement             |
| 5421     | AR-8m      | 7.5   | PIN2, epithelial hyperplasia                                |
| 5423     | AR-8m      | 8.0   | PIN2                                                        |
